# Supplementary material for: Detection of A(H5N1) influenza virus nucleic acid in retail pasteurized milk
Source: Research Square preprint supplement (doi:10.21203/rs.3.rs-4572362/v1), 2024-06-28
Supplement: Supplementary file 1 [file 9fd9d577d426c320d0928cc0.xlsx]

## Sheet: Sheet1
Milk Sample ID	Date of Sample Collection	Milk Processing Plant State	IAV rRT-PCR Result
24MK0001	4/13/2024	Texas	Positive
24MK0002	4/13/2024	Texas	Positive
24MK0003	4/13/2024	Texas	Negative
24MK0004	4/13/2024	Arizona	Negative
24MK0006	4/13/2024	Texas	Negative
24MK0007	4/13/2024	California	Negative
24MK0008	4/13/2024	Virginia	Negative
24MK0009	4/13/2024	Texas	Positive
24MK0010	4/13/2024	Minnesota	Negative
24MK0012	4/13/2024	Texas	Positive
24MK0013	4/13/2024	Indiana	Negative
24MK0014	4/13/2024	California	Negative
24MK0015	4/13/2024	Colorado	Positive
24MK0016	4/14/2024	Texas	Positive
24MK0017	4/14/2024	Colorado	Negative
24MK0019	4/14/2024	Texas	Negative
24MK0020	4/14/2024	Arizona	Negative
24MK0021	4/14/2024	Texas	Positive
24MK0022	4/14/2024	Colorado	Positive
24MK0023	4/14/2024	Indiana	Negative
24MK0024	4/14/2024	Texas	Positive
24MK0025	4/14/2024	New York	Negative
24MK0026	4/14/2024	Colorado	Negative
24MK0027	4/14/2024	Texas	Positive
24MK0028	4/14/2024	Texas	Positive
24MK0029	4/14/2024	Texas	Negative
24MK0030	4/14/2024	Texas	Positive
24MK0031	4/14/2024	Arizona	Negative
24MK0032	4/14/2024	Texas	Positive
24MK0033	4/14/2024	Texas	Positive
24MK0034	4/14/2024	Texas	Positive
24MK0035	4/14/2024	Texas	Positive
24MK0036	4/14/2024	Texas	Positive
24MK0037	4/14/2024	Minnesota	Negative
24MK0039	4/14/2024	Texas	Positive
24MK0040	4/14/2024	Texas	Positive
24MK0041	4/14/2024	New York	Negative
24MK0042	4/14/2024	Michigan	Negative
24MK0043	4/14/2024	Texas	Positive
24MK0044	4/14/2024	Texas	Positive
24MK0045	4/14/2024	Texas	Positive
24MK0046	4/14/2024	Kentucky	Negative
24MK0047	4/14/2024	Texas	Negative
24MK0048	4/14/2024	Colorado	Negative
24MK0049	4/14/2024	Colorado	Negative
24MK0050	4/14/2024	Texas	Positive
24MK0051	4/14/2024	Texas	Positive
24MK0052	4/14/2024	Colorado	Negative
24MK0053	4/14/2024	Colorado	Negative
24MK0054	4/14/2024	Colorado	Negative
24MK0055	4/14/2024	Indiana	Positive
24MK0056	4/15/2024	Colorado	Negative
24MK0057	4/15/2024	Texas	Positive
24MK0058	4/15/2024	Arizona	Negative
24MK0059	4/15/2024	Texas	Negative
24MK0060	4/15/2024	Arkansas	Positive
24MK0061	4/15/2024	Arkansas	Positive
24MK0062	4/15/2024	Texas	Positive
24MK0063	4/15/2024	New York	Negative
24MK0064	4/15/2024	Michigan	Negative
24MK0065	4/15/2024	Ohio	Negative
24MK0066	4/15/2024	Minnesota	Negative
24MK0067	4/15/2024	Ohio	Negative
24MK0068	4/15/2024	Oklahoma	Positive
24MK0069	4/15/2024	Kansas	Positive
24MK0070	4/15/2024	Colorado	Positive
24MK0071	4/15/2024	Kansas	Positive
24MK0072	4/15/2024	Indiana	Negative
24MK0073	4/15/2024	Arizona	Negative
24MK0074	4/15/2024	Indiana	Positive
24MK0075	4/15/2024	Indiana	Negative
24MK0076	4/15/2024	Nebraska	Negative
24MK0077	4/15/2024	Texas	Positive
24MK0078	4/15/2024	Nebraska	Negative
24MK0079	4/15/2024	Nebraska	Negative
24MK0080	4/15/2024	Nebraska	Negative
24MK0081	4/15/2024	Kansas	Positive
24MK0082	4/15/2024	Kansas	Positive
24MK0083	4/15/2024	Kansas	Positive
24MK0084	4/15/2024	Kansas	Positive
24MK0085	4/15/2024	Kansas	Positive
24MK0086	4/15/2024	Colorado	Negative
24MK0087	4/15/2024	Kansas	Negative
24MK0088	4/15/2024	Indiana	Negative
24MK0089	4/15/2024	Oklahoma	Positive
24MK0090	4/15/2024	Oklahoma	Positive
24MK0091	4/15/2024	Kansas	Negative
24MK0092	4/15/2024	Kansas	Positive
24MK0093	4/15/2024	Kansas	Positive
24MK0094	4/15/2024	New York	Negative
24MK0095	4/15/2024	Missouri	Negative
24MK0096	4/15/2024	Missouri	Negative
24MK0097	4/15/2024	Colorado	Negative
24MK0098	4/15/2024	New York	Negative
24MK0099	4/15/2024	New York	Negative
24MK0100	4/15/2024	Colorado	Negative
24MK0101	4/15/2024	Colorado	Negative
24MK0102	4/15/2024	Colorado	Negative
24MK0103	4/15/2024	Colorado	Negative
24MK0104	4/15/2024	Kansas	Positive
24MK0105	4/15/2024	Indiana	Negative
24MK0106	4/15/2024	Colorado	Negative
24MK0107	4/15/2024	Michigan	Positive
24MK0108	4/15/2024	Michigan	Negative
24MK0109	4/15/2024	Colorado	Positive
24MK0110	4/15/2024	Kansas	Negative
24MK0111	4/15/2024	Kansas	Positive
24MK0112	4/15/2024	Kansas	Positive
24MK0115	4/16/2024	Ohio	Positive
24MK0116	4/16/2024	Minnesota	Negative
24MK0120	4/16/2024	Indiana	Negative
24MK0122	4/16/2024	New York	Negative
24MK0123	4/16/2024	Michigan	Negative
24MK0125	4/16/2024	Missouri	Negative
24MK0126	4/16/2024	Texas	Positive
24MK0127	4/16/2024	Michigan	Negative
24MK0128	4/16/2024	New York	Negative
24MK0132	4/19/2024	Ohio	Negative
24MK0134	4/18/2024	Minnesota	Negative
24MK0135	4/18/2024	Minnesota	Positive
24MK0136	4/18/2024	Michigan	Negative
24MK0137	4/18/2024	Michigan	Negative
24MK0138	4/13/2024	Ohio	Negative
24MK0139	4/13/2024	Ohio	Negative
24MK0140	4/13/2024	Ohio	Negative
24MK0141	4/13/2024	Ohio	Negative
24MK0142	4/13/2024	Ohio	Negative
24MK0143	4/13/2024	Ohio	Negative
24MK0144	4/13/2024	Ohio	Negative
24MK0145	4/13/2024	Indiana	Negative
24MK0146	4/13/2024	Missouri	Positive
24MK0147	4/13/2024	Ohio	Positive
24MK0148	4/13/2024	Virginia	Negative
24MK0149	4/13/2024	Indiana	Negative
24MK0150	4/13/2024	Colorado	Positive
24MK0152	4/13/2024	Indiana	Negative
24MK0153	4/13/2024	New York	Negative
24MK0154	4/13/2024	Indiana	Negative
24MK0155	4/13/2024	Indiana	Negative
24MK0156	4/13/2024	New York	Negative
24MK0159	4/13/2024	Minnesota	Negative
24MK0160	4/19/2024	Ohio	Negative
24MK0161	4/19/2024	Indiana	Negative
24MK0162	4/19/2024	Ohio	Negative
24MK0163	4/19/2024	Ohio	Negative
24MK0164	4/19/2024	Ohio	Negative
24MK0165	4/21/2024	Maryland	Negative
24MK0166	4/20/2024	Michigan	Positive
24MK0167	4/20/2024	Michigan	Positive
24MK0168	4/20/2024	Michigan	Negative
24MK0169	4/20/2024	Michigan	Negative
24MK0170	4/20/2024	Michigan	Negative
IL-M01	4/16/2024	Indiana	Negative
IL-M02	4/16/2024	Indiana	Negative
IL-M03	4/16/2024	Indiana	Negative
IL-M04	4/16/2024	Indiana	Negative
IL-M08	4/16/2024	Michigan	Negative
IL-M09	4/16/2024	Michigan	Positive
IL-M10	4/16/2024	Michigan	Positive
IL-M11	4/16/2024	Ohio	Negative
IL-M12	4/16/2024	Ohio	Negative
IL-M14	4/16/2024	Indiana	Negative
IL-M15	4/16/2024	Indiana	Negative
24MK0172	4/29/2024	California	Negative
24MK0173	4/30/2024	Georgia	Negative
24MK0175	5/1/2024	Missouri	Negative
24MK0176	5/3/2024	Texas	Positive
AR001	4/20/2024	Arkansas	Positive
